# Supplementary material for: Construction of ratiometric fluorescent sensors by ribonucleopeptides
Source: Royal Society of Chemistry journal article supplement (doi:10.1039/c2ob26722e), 2012-01-01
Supplement: c2ob26722e.pdf [file c2ob26722e.pdf]

# Construction of Ratiometric Fluorescent Sensors by Ribonucleopeptides

Chiara Annoni,<sup>a,b</sup> Eiji Nakata,<sup>b,c</sup> Tomoki Tamura,<sup>b</sup> Fong Fong Liew,<sup>b</sup> Shun Nakano,<sup>c</sup> Maria Luisa Gelmi,<sup>a</sup> Takashi Morii<sup>b,c,\*</sup>

<sup>a</sup> *Dipartimento di Scienze Farmaceutiche "Pietro Pratesi", Sezione Chimica Generale Organica "A. Marchesini", Università degli Studi di Milano, via Venezian 21, 20133 Milan, Italy.*

<sup>b</sup> *Graduate School of Energy Science, Kyoto University, Uji, Kyoto 611-0011, Japan.*

<sup>c</sup> *Institute of Advanced Energy, Kyoto University, Uji, Kyoto 611-0011, Japan. Fax: +81 (0)774-38-3516; Tel: +81 (0)774-38-3585; E-mail: t-morii@iae.kyoto-u.ac.jp*

## Supporting Information

### Materials

Tetracycline, dopamine, norepinephrine and tyrosine were purchased from Sigma Aldrich. Chloramphenicol, gel electrophoresis grade acrylamide and bisacrylamide was provided by Wako Chemicals GmbH. Streptomycin was obtained from Nacalai Tesque. N-Fmoc-protected amino acids, Fmoc-NH-SAL-PEG resin (0.23mmol/g), HBTU (2-(1*H*-benzotriazole-1-yl)-1,1,3,3-tetramethyluronium hexafluorophosphate), HOBt (1-hydroxybenzotriazole), DIEA (N,N-diisopropylethylamine), TFA (trifluoroacetic acid) and distilled DMF (N,N-dimethylformamide) were purchased from Watanabe Chemical Industry. All other chemicals were reagent grade and used without further purification.

### Methods

#### Nucleic acids preparation

The nucleic acids used in this study were prepared according to the procedure previously reported.<sup>[6, 8, 9, 14, S1]</sup> Concentration of RNA was determined by UV spectroscopy.

#### SNARF-Rev and SNARF-Abu-Rev preparation

The procedure for the synthesis of fluorophore-labeled Rev peptides were previously reported.<sup>[3]</sup> Briefly, the two Rev peptides were synthesized on a Shimadzu PSSM-8 peptide synthesizer according to the Fmoc chemistry protocols. In SNARF-Abu-Rev two residues of  $\gamma$ -aminobutyric acid were manually attached to the N-terminus of the peptide applying Fmoc-SPPS strategies (HOBt, HBTU as activators, DIEA as base). SNARF, which was synthesized according to previous report<sup>[7]</sup>, was directly coupled, after activating the carboxyl function, to the N-terminal deprotected residue of Rev peptide on the resin. SNARF-Rev and SNARF-Abu-Rev peptides were then deprotected, cleaved from the resin and purified by using RP-HPLC. Characterization was achieved by MALDI-TOF MS spectrometry (AXIMA-LNR, Shimadzu Biotech) [6-carboxy-SNARF-Rev+H]<sup>+</sup> calc. m/z 3314.12 obs.m/z 3313.35; [6-carboxy-SNARF-abu-Rev+H]<sup>+</sup> calc. m/z 3729.38 obs. m/z 3728.23.

#### Fluorescent measurements on the microplate

The 96-well fluorescence measurements were performed on an Infinite M200PRO instrument (TECAN co. ltd.). For tetracycline titration, a binding solution (100  $\mu$ l) containing 1  $\mu$ M of fluorescent RNP in 10mM Tris HCl (pH 7.0), 250 mM NaCl, 5 mM MgCl<sub>2</sub> 0.005% Tween 20 was prepared. For dopamine and other catecholamine derivatives, a binding solution (100  $\mu$ l) containing 1  $\mu$ M fluorescent RNP in 10mM Tris HCl (pH 7.60), 300 mM NaCl, 5 mM MgCl<sub>2</sub> 0.005% Tween 20 was prepared. For streptomycin, a binding solution (100  $\mu$ l) of 1  $\mu$ M concentration of fluorescent RNP was prepared in 50mM Tris-HCl (pH 7.6), 250 mM NaCl, 10 mM MgCl<sub>2</sub> 0.005% Tween 20 buffer conditions. Well-mixed samples with different concentrations of substrates were incubated at 25°C for 30 min followed by the measurement of emission spectra (measured emission spectrum range: 570-700 nm; excitation wavelength utilized: 534 nm).

### Determination of dissociation constants

The dissociation constant were achieved applying the following equation:

$$F_{\text{obs}} = A(([\text{RNP}]_{\text{T}} + [\text{substrate}]_{\text{T}} + K_{\text{D}}) - ([\text{RNP}]_{\text{T}} + [\text{substrate}]_{\text{T}} + K_{\text{D}})^2 - (4[\text{RNP}]_{\text{T}}[\text{substrate}]_{\text{T}})^{1/2}) / 2[\text{RNP}]_{\text{T}}$$

where A is the increase in fluorescence at saturating substrate concentrations ( $R_{\text{sat}} - R_0$ ),  $K_{\text{D}}$  is the equilibrium dissociation constant,  $[\text{RNP}]_{\text{T}}$  and  $[\text{substrate}]_{\text{T}}$  are the total concentrations of RNP and the substrate, respectively. DHc65-RRE/SNARF-Rev provided an  $I/I_0$  value of 0.85 and a  $K_{\text{D}}$  of 1.1  $\mu\text{M}$ . While a norepinephrine titration provide a  $K_{\text{D}}$  value of 2.0  $\mu\text{M}$ . Comparable results were achieved from by the standard binding isotherm obtained from the titration curve of DH05-RRE/SNARF-Rev with dopamine and norepinephrine ( $K_{\text{D}}$  values respectively of 1.1  $\mu\text{M}$  for dopamine and 1.9  $\mu\text{M}$  for norepinephrine). These values are consistent with the results previously reported <sup>[12]</sup> showing just a slightly higher affinity.

### Fluorescent pH titration

The 96-well fluorescence measurements were performed on an Infinite M200PRO instrument (TECAN co. ltd.). Samples were prepared in a 10mM of a wide-range pH buffer using Tris HCl, Acetate buffer and Mes buffer, in order to achieve a 6.00 to 8.00 interval of pH values. To the binding solution containing 1  $\mu\text{M}$  of fluorescent RNP in 250 mM NaCl, 5 mM  $\text{MgCl}_2$ , 0.005% Tween 20, 3 $\mu\text{M}$  tetracycline was added. Well-mixed samples, with different buffer pH values (6.00, 6.25, 6.50, 6.75, 7.00, 7.25, 7.50, 7.75, 8.00) in the presence and in the absence of tetracycline, were incubated at 25°C for 30 min followed by the measurement of emission spectra (measured emission spectrum range: 570-700 nm; excitation wavelength utilized: 534 nm).

### Fluorescent image evaluation

Fluorescent image evaluation was accomplished in the presence and in the absence of tetracycline using Pharos FX Imager. A wide range pH buffer was utilized (Tris HCl, Acetate buffer and Mes buffer). 10  $\mu\text{l}$  of the binding solution containing 1  $\mu\text{M}$  RNP in 250 mM NaCl, 5 mM  $\text{MgCl}_2$ , 0.005% Tween 20 were added to a glass plate (S117814, Matsunami glass int. ltd.) and, after 30 min incubation at room temperature, were scanned (excitation wavelength 534 nm; filters at  $580 \pm 25$  nm and  $640 \pm 20$  nm).

Table S1. Equilibrium dissociation constants  $K_D$  ( $\mu\text{M}$ ) of dopamine-binding RNPs.

| Ligand         | $K_D$ [ $\mu\text{M}$ ] |               |           |               |
|----------------|-------------------------|---------------|-----------|---------------|
|                | DHc65                   |               | DH05      |               |
|                | SNARF-Rev               | SNARF-abu-Rev | SNARF-Rev | SNARF-abu-Rev |
| Dopamine       | 1.1                     | 1.2           | 1.1       | 1.5           |
| Norepinephrine | 1.9                     | 1.3           | 2.0       | 1.5           |
| Tyrosine       | >100                    | >100          | >100      | >100          |

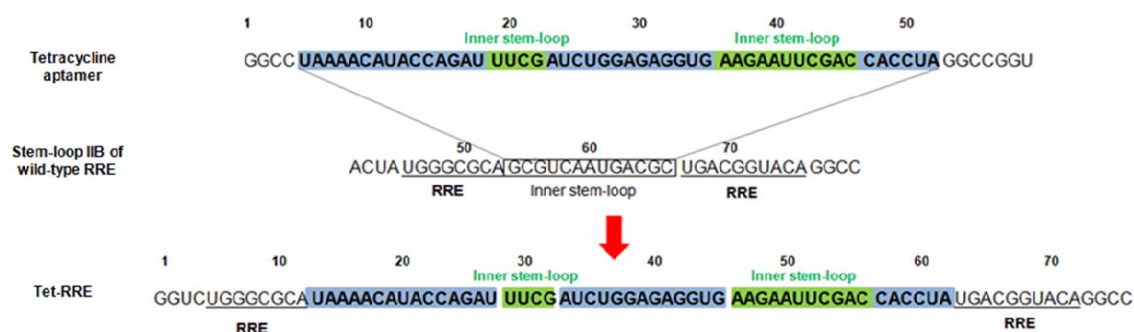

Figure S1. Nucleotide sequences of the tetracycline aptamer, RRE RNA, and modular tetracycline-binding RNP (tet-RRE RNA). The tetracycline aptamer fused to the RRE sequence (tet-RRE) was complexed with 6-carboxy-SNARF-modified Rev (SNARF-Rev and SNARF-abu-Rev).

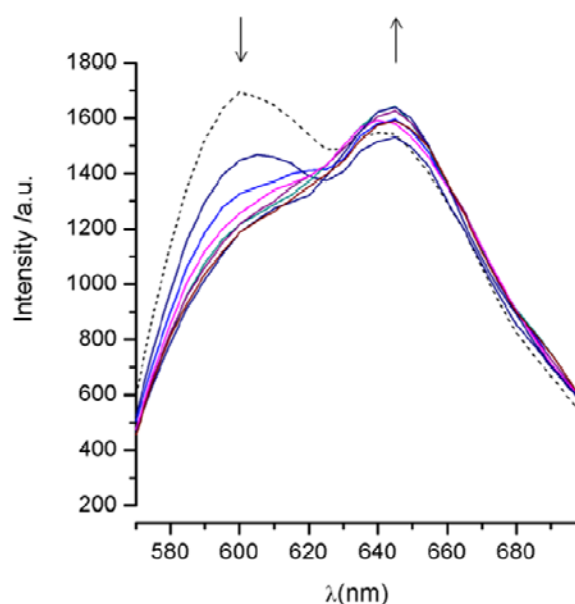

Figure S2. Fluorescence spectral change of tet-RRE/ SNARF-Rev upon the addition of tetracycline (0-30  $\mu$ M). The arrows show the direction of change of the spectrum at that position as tetracycline concentration is increased.

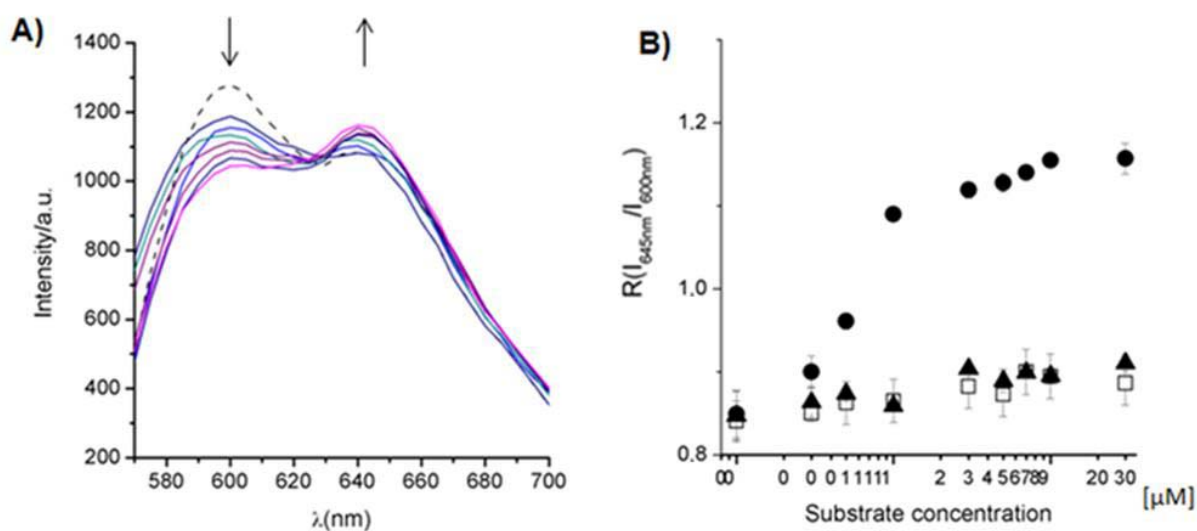

Figure S3. A) Fluorescence spectral change of tet-RRE/ SNARF-abu-Rev upon the addition of tetracycline (0-30  $\mu\text{M}$ ). B) Fluorescence titration plot of the emission intensity ratio (645 nm / 600 nm) of tet-RRE/ SNARF-abu-Rev vs. the antibiotic compounds concentration. Tetracycline (black filled circle), streptomycin (black filled triangle), chloramphenicol (black opened square).

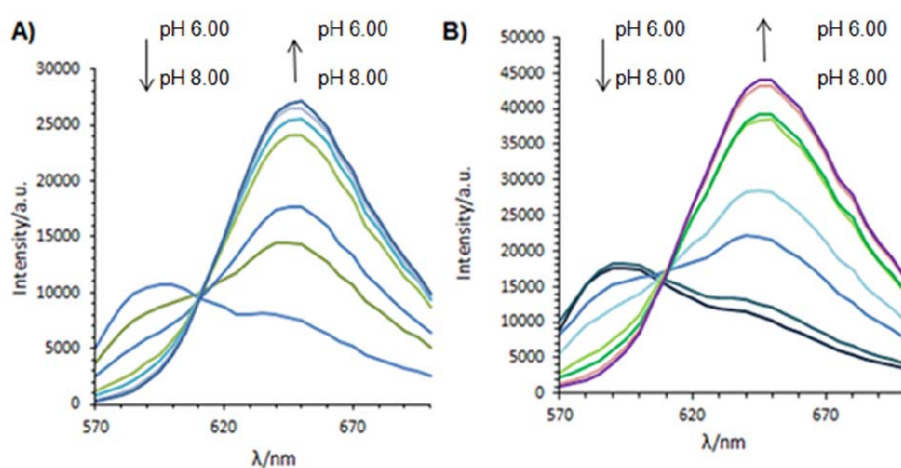

Figure S4. A) Fluorescence spectral change of tet-RRE/ SNARF-Rev at different pH values (6.00 to 8.00). B) Fluorescence spectral change of tet-RRE/ SNARF-abu-Rev at different pH values (pH 6.00 to 8.00).

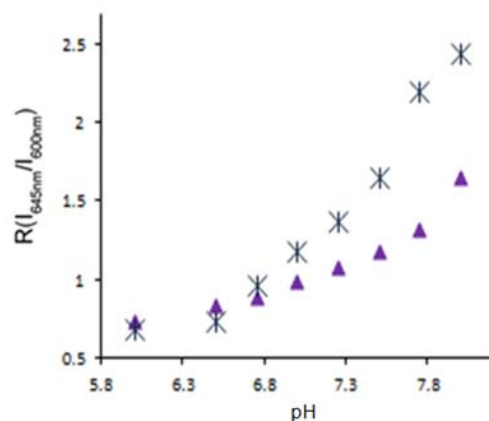

Figure S5. A pH titration (pH 6.00 to 8.00) of tet-RRE/SNARF-Rev RNP (filled purple triangle) and tet-RRE/SNARF-Rev upon 3  $\mu$ M tetracycline addition (dark snow construction line).

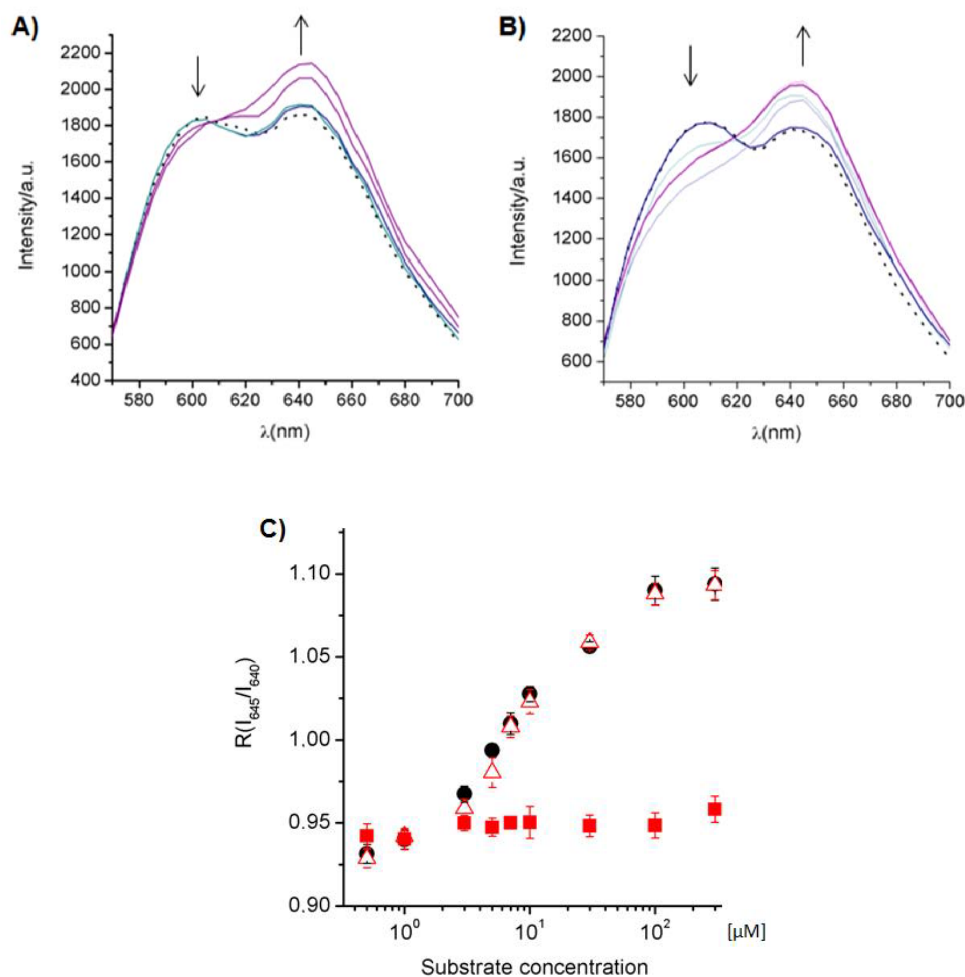

Figure S6. A) Fluorescence spectral change of DHc65-RRE/SNARF-Rev upon the addition of dopamine (0-300  $\mu$ M). B) Fluorescence spectral change of DHc65-RRE/SNARF-abu-Rev upon the addition of dopamine (0-300  $\mu$ M). C) Fluorescence titration plot of the emission intensity ratio (645 nm / 600 nm) of DHc65-RRE/SNARF-abu-Rev with dopamine (filled black circle), norepinephrine (open red triangle), L-tyrosine (filled red square).

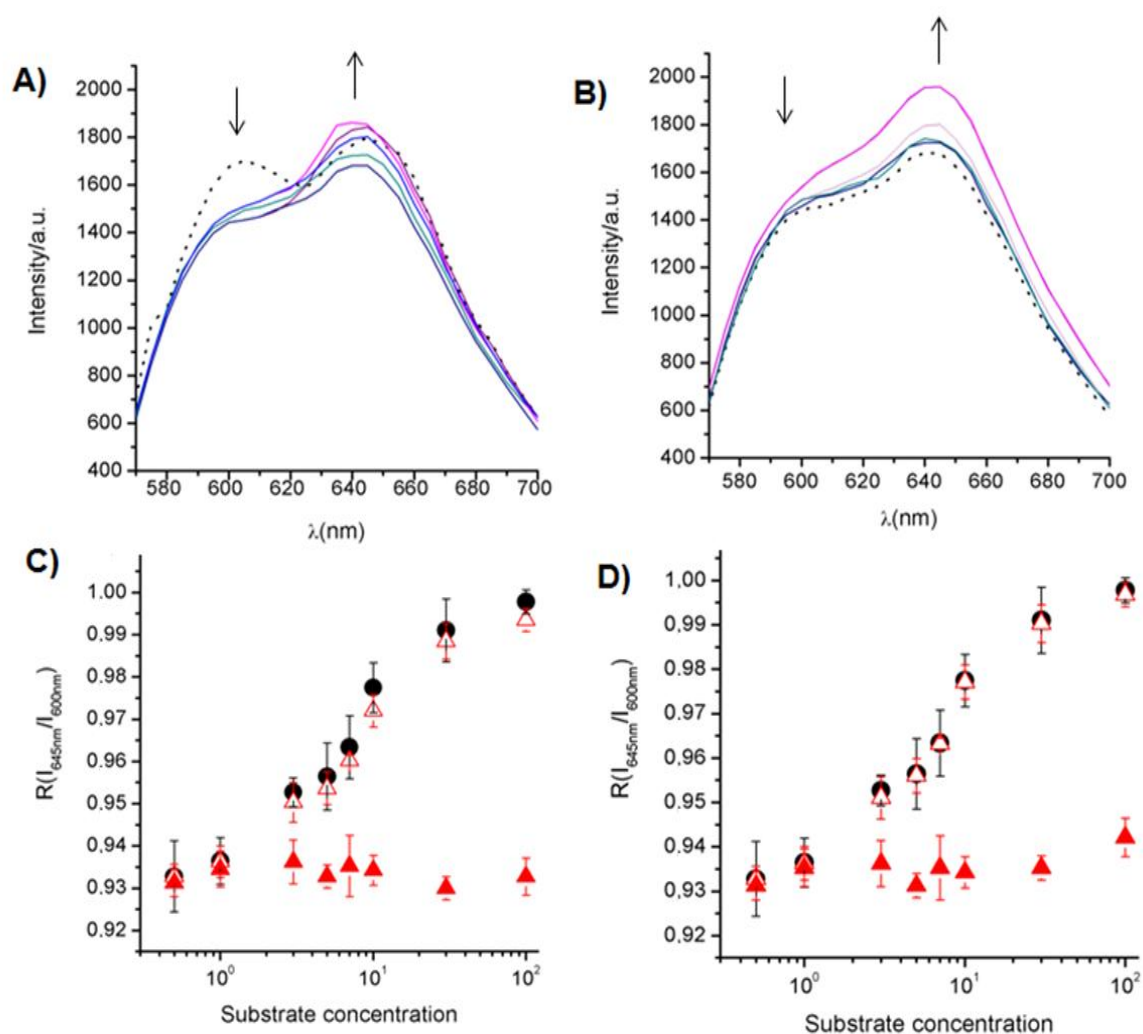

Figure S7. A) Fluorescence spectral change of DH05-RRE/SNARF-Rev upon dopamine addition (0-300  $\mu\text{M}$ ). B) Fluorescence spectral change of DH05-RRE/SNARF-abu-Rev upon dopamine addition (0-300  $\mu\text{M}$ ). C) Fluorescence titration plot of the emission intensity ratio (645 nm / 600 nm) of DHc65-RRE/SNARF-abu-Rev with dopamine (filled black circle), norepinephrine (open red triangle), L-tyrosine (filled red square).

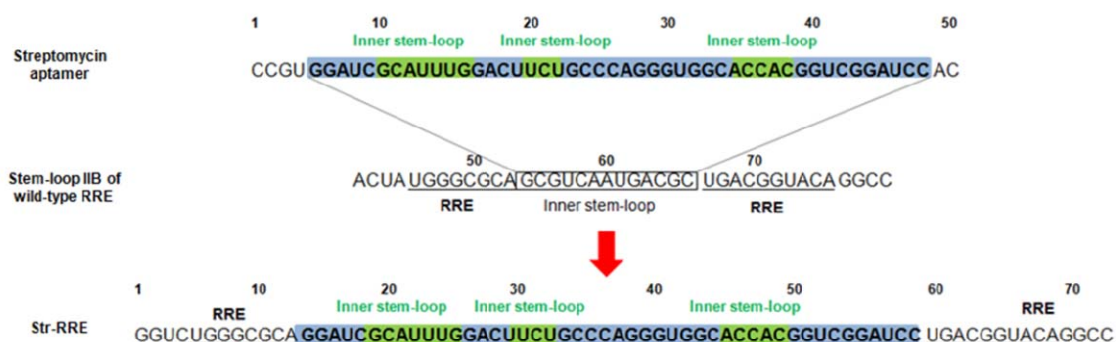

Figure S8. Nucleotide sequences of the streptomycin aptamer, RRE RNA, and modular streptomycin-binding RNP (str-RRE RNA). The streptomycin aptamer fused to the RRE sequence (str-RRE) was complexed with 6-carboxy-SNARF-modified Rev (SNARF-Rev and SNARF-abu-Rev).

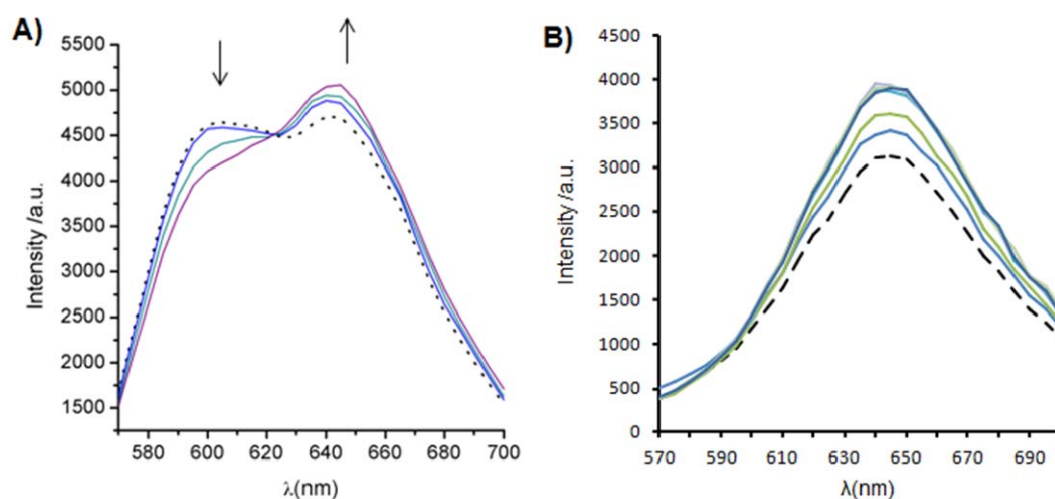

Figure S9. A) Fluorescence spectral change of str-RRE/SNARF-Rev upon the addition of streptomycin (0-300  $\mu$ M). B) Fluorescence spectral change of str-RRE/SNARF-abu-Rev upon the addition of streptomycin (0-300  $\mu$ M).

#### Reference

S1) A. Kertsgurg, G. A. Soukup, *Nucleic Acids Res.* **2002**, 30, 4599.
